# Supplementary material for: Ultrasensitive and selective DNA detection by hydroxylamine assisted gold nanoparticle amplification
Source: Royal Society of Chemistry journal article supplement (doi:10.1039/c1cc10914f), 2011-01-01
Supplement: c1cc10914f.pdf [file c1cc10914f.pdf]

### Ultrasensitive and Selective DNA Detection by Hydroxylamine Assisted Gold Nanoparticle Amplification

Sheng Cai, Liang Xin, Choiwan Lau, Jianzhong Lu\* and Xueji Zhang\*

School of Pharmacy, Fudan University, 826 Zhangheng Road, Shanghai 201203, China

Department of Chemistry, University of South Florida, 4202 E. Fowler Ave. CHE-205A, Tampa, FL 33620-5250, USA

**Apparatus.** CL measurements were performed with a BPCL chemiluminescence analyzer (Beijing, China) and Fluoroskan Ascent FL (Thermo). Particle size-distribution was measured with a NICOMP™ 380 ZLS (Particle Sizing System, Santa Barbara, USA). Sizes and morphologies of Au NPs were determined at 80 kV using a JEOL JEM-1230 transmission electron microscope.

**Reagents.** All chemicals were of analytical grade and were used as received. The water was prepared using Milli-XQ equipment. DNA-BIND 96-well plates were obtained from Corning Incorporated. 5-nm, 10-nm, 30-nm and 50-nm naked Au NPs, 40-nm streptavidin-gold was bought from BB International. 10-nm streptavidin-gold and streptavidin-HRP were bought from Sigma-Aldrich. HRP substrate kits were purchased from Millipore Corporation, USA. NH<sub>2</sub>OH, HAuCl<sub>4</sub>, and other chemical reagents were purchased from Sinopharm Chemical Reagent Co. Ltd. Oligonucleotides were acquired from Invitrogen Biotechnology Co., Ltd (Shanghai, China) and had the following sequences (Table S1).

**Table S1.** DNA sequences used in this work

| Name         | Sequence                                                            |
|--------------|---------------------------------------------------------------------|
| Capture DNA  | 5'-NH <sub>2</sub> -(A) <sub>20</sub> ACC TTT AAC CTA ATC TCC TC-3' |
| Target DNA   | 5'-TGG GAG GAG TTG GGG GAG GAG ATT AGG TTA AAG GT-3'                |
| Reporter DNA | 5'-CCC CAA CTC CTC CCA AAA AAA AAA A-biotin-3'                      |
| C-C mismatch | 5'- TGG GAG CAG TTG GGG GAG GAG ATT AGG TTA AAG GT-3'               |
| C-A mismatch | 5'- TGG GAG AAG TTG GGG GAG GAG ATT AGG TTA AAG GT-3'               |

|                         |                                                                     |
|-------------------------|---------------------------------------------------------------------|
| C-T mismatch            | 5'-TGG CAG TAC TTT GGG GAG GAG ATT AGG TTA AAG GT-3'                |
| T-T mismatch            | 5'-TGG GAG GTG TTG GGG GAG GAG ATT AGG TTA AAG GT-3'                |
| A-A mismatch            | 5'-TGG GAG GAG TTG GGG GAG GAG ATT AGG ATA AAG GT-3'                |
| A-G mismatch            | 5'-TGG GAG GAG TTG GGG GAG GAG ATT AGG GTA AAG GT-3'                |
| A-C mismatch            | 5'-TGG GAG GAG TTG GGG GAG GAG ATT AGG CTA AAG GT-3'                |
| Two-base mismatch       | 5'-TGG GAG GAG TTG GGG GAG GAG ATT AGG AAA AAG GT-3'                |
| Noncomplementary strand | 5'-TGA GGT AGT AGG TTG TAT AGT T-3'                                 |
| Capture DNA 24          | 5'-NH <sub>2</sub> -(A) <sub>20</sub> CCT AAT CTC CTC-3'            |
| Reporter DNA 24         | 5'-CCC CAA CTC CTC AAA AAA AAA A-biotin-3'                          |
| Target DNA 24           | 5'-GAG GAG TTG GGG GAG GAG ATT AGG-3'                               |
| Capture DNA 30          | 5'-NH <sub>2</sub> -(A) <sub>20</sub> TAA CCT AAT CTC CTC-3'        |
| Reporter DNA 30         | 5'-CCC CAA CTC CTC CCA AAA AAA AAA A-biotin-3'                      |
| Target DNA 30           | 5'-TGG GAG GAG TTG GGG GAG GAG ATT AGG TTA-3'                       |
| Capture DNA 40          | 5'-NH <sub>2</sub> -(A) <sub>20</sub> ACC TTT AAC CTA ATC TCC TC-3' |
| Reporter DNA 40         | 5'-CCC CAA CTC CTC CCA GTC TTA AAA AAA AAA-biotin-3'                |
| Target DNA 40           | 5'-AGA CTG GGA GGA GTT GGG GGA GGA GAT TAG GTT AAA GGT-3'           |
| Capture DNA 45          | 5'-NH <sub>2</sub> -(A) <sub>20</sub> ACC TTT AAC CTA ATC TCC TC-3' |
| Reporter DNA 45         | 5'-CCC CAA CTC CTC CCA GTC TTT AAA CAA AAA AAA AA-biotin-3'         |
| Target DNA 45           | 5'-GTT TAA AGA CTG GGA GGA GTT GGG GGA GGA GAT TAG GTT AAA GGT-3'   |

**Preparation of gold probes.** 60-pmol biotinylated reporter sequences were added to 150  $\mu$ L of buffer A (20 mM Tris-HCl, pH 8.0, 0.5 M NaCl) solution that contained 60  $\mu$ L of 40-nm streptavidin-gold. The mixture was incubated at 37 °C for 1 h. The conjugates were washed several times with 500  $\mu$ L wash buffer (7 mM Tris-HCl, pH 8.0, 0.17 M NaCl, 0.05% Tween 20) by centrifuging at 12000 rpm for 3 min. The soft sediment of gold probes was then resuspended in 120  $\mu$ L buffer A containing 1% BSA at 4 °C before use. The concentration of gold probes was estimated by UV-Vis spectroscopy to be about 0.545 nM, based on an extinction coefficient of  $9.264 \times 10^9 \text{ M}^{-1} \text{ cm}^{-1}$  at  $\epsilon=520 \text{ nm}$  for 40 nm Au NPs.

**Assay procedures on polystyrene microwells.** In a typical experiment, amine modified capture probes were diluted to 0.1 pmol per 100  $\mu$ L of coupling buffer (0.5 M  $\text{Na}_2\text{HPO}_4\text{-NaH}_2\text{PO}_4$ , pH 8.5) and divided into the wells of a DNA-BIND 96-well plate (100- $\mu$ L per well). The wells were washed three times with wash buffer after incubating with gentle mixing for 40 min at 37  $^\circ\text{C}$ . Different amounts of target DNA or mismatched DNA was then added into each well (100- $\mu$ L per well, in buffer A). Following a 40-min incubation with gentle mixing at 37  $^\circ\text{C}$ , the wells were washed three times with wash buffer. Four microliters of gold probes were added and incubated in 100- $\mu$ L buffer A containing 5% BSA at 37  $^\circ\text{C}$  for 40 min. The wells were then washed three times with wash buffer before 50  $\mu$ L of 2.5 mM luminol (0.1 M NaOH) was pipetted into the microwells. Finally, 50  $\mu$ L of 0.1 mM  $\text{AgNO}_3$  solution was injected and the CL signal was displayed in the Fluoroskan Ascent FL. For the amplification assay procedure, Au NPs that assembled on the surface of the 96-well plate were catalytically enlarged in the presence of 1 mM  $\text{NH}_2\text{OH}$  and 0.1 mM  $\text{HAuCl}_4$  at room temperature for 20 min. The wells were washed three times with wash buffer, and then detected as described above. For comparison, streptavidin-HRP was also used instead of gold probes, and CL signals on the surface of the 96-well plate were detected directly with 100  $\mu$ L of CL HRP substrate.

**Optimization of Reaction Parameters.** Several parameters were investigated systematically to establish optimal conditions for the ultrasensitive DNA detection, including the amounts of capture DNA, streptavidin gold, reporter DNA, luminol,  $\text{AgNO}_3$ ,  $\text{HAuCl}_4$  and  $\text{NH}_2\text{OH}$ , etc.

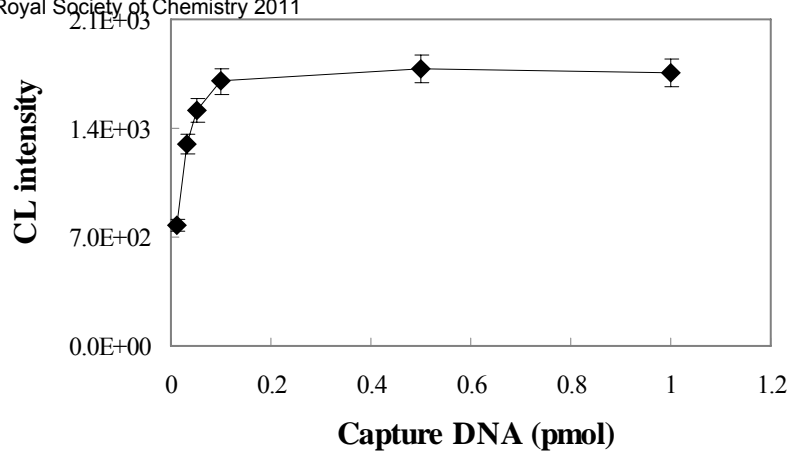

**Figure S1.** CL intensity vs the amount of capture probes. Experimental conditions: target DNA and biotinylated reporter sequence were 0.006 and 5 pmol, respectively; 40-nm streptavidin-gold was 56 pM; luminol and AgNO<sub>3</sub> were 2.5 and 0.1 mM, respectively.

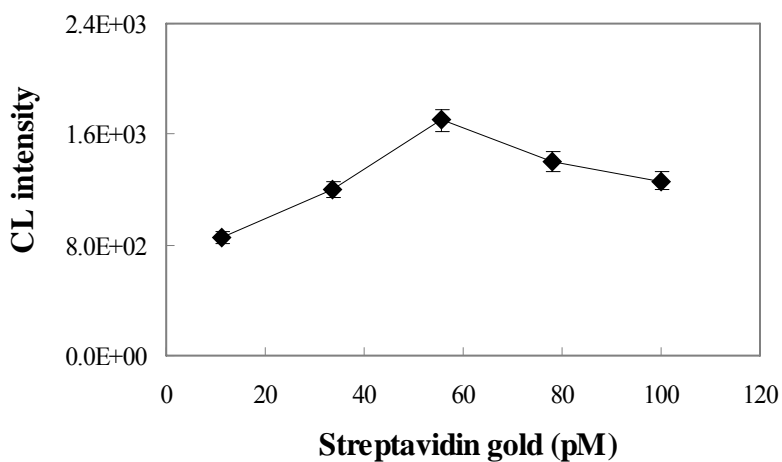

**Figure S2.** CL intensity vs. the concentration of 40-nm streptavidin-gold. Experimental conditions: capture probe, target DNA and biotinylated reporter sequence were 0.1, 0.006 and 5 pmol, respectively; luminol and AgNO<sub>3</sub> were 2.5 and 0.1 mM, respectively.

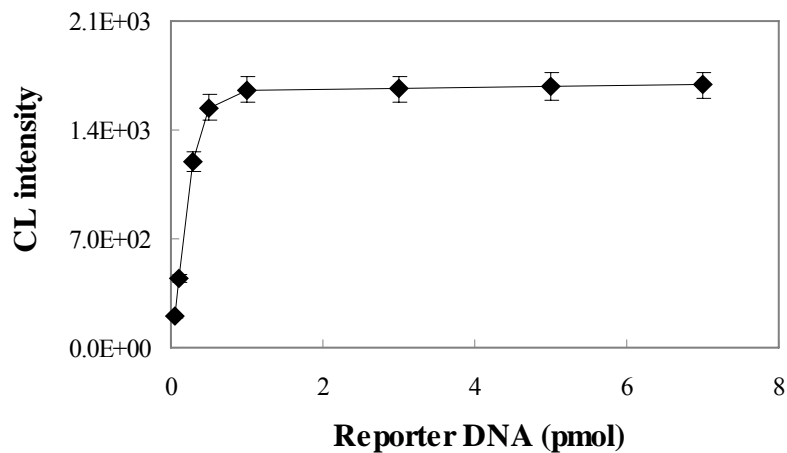

Figure S3. CL intensity vs. the amount of biotinylated reporter sequence. Experimental conditions: capture probe and target DNA were 0.1 and 0.006 pmol, respectively; 40-nm streptavidin-gold was 56 pM; luminol and  $\text{AgNO}_3$  were 2.5 and 0.1 mM, respectively.

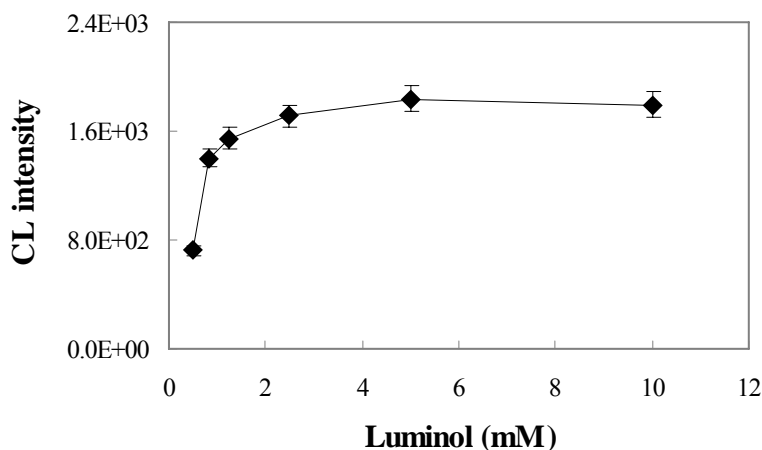

Figure S4. CL intensity vs. the concentration of luminol. Experimental conditions: capture probe, target DNA and biotinylated reporter sequence were 0.1, 0.006 and 5 pmol, respectively; 40-nm streptavidin-gold was 56 pM and  $\text{AgNO}_3$  was 0.1 mM.

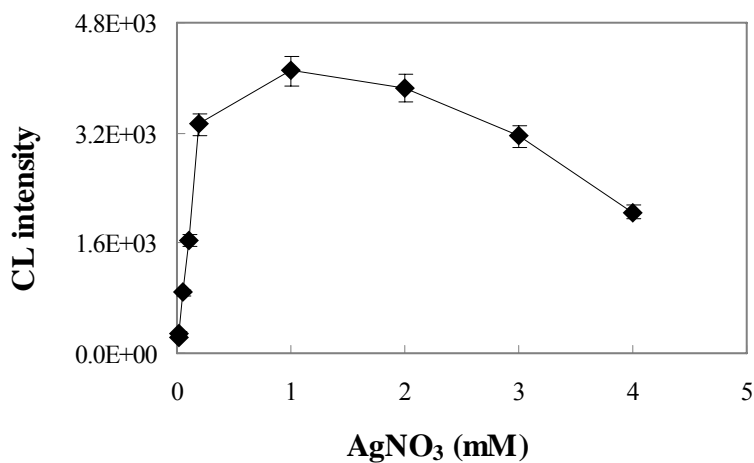

Figure S5. CL intensity vs. the concentration of  $\text{AgNO}_3$ . Experimental conditions: capture probe, target DNA and biotinylated reporter sequence were 0.1, 0.006 and 5 pmol, respectively; 40-nm streptavidin-gold was 56 pM and luminol was 2.5 mM.

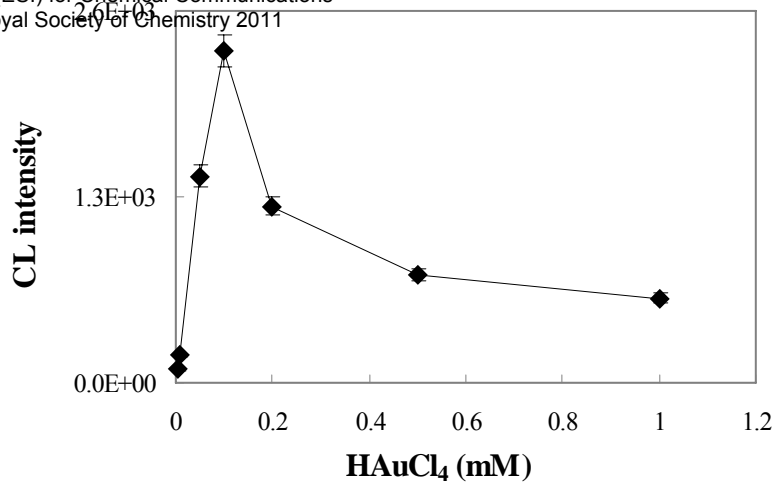

**Figure S6.** CL intensity vs. the concentration of HAuCl<sub>4</sub>. Experimental conditions: capture probe, target DNA and biotinylated reporter sequence were 0.1, 0.0001 and 5 pmol, respectively; 40-nm streptavidin-gold was 56 pM; luminol, AgNO<sub>3</sub> and NH<sub>2</sub>OH were 2.5, 1 and 1 mM, respectively.

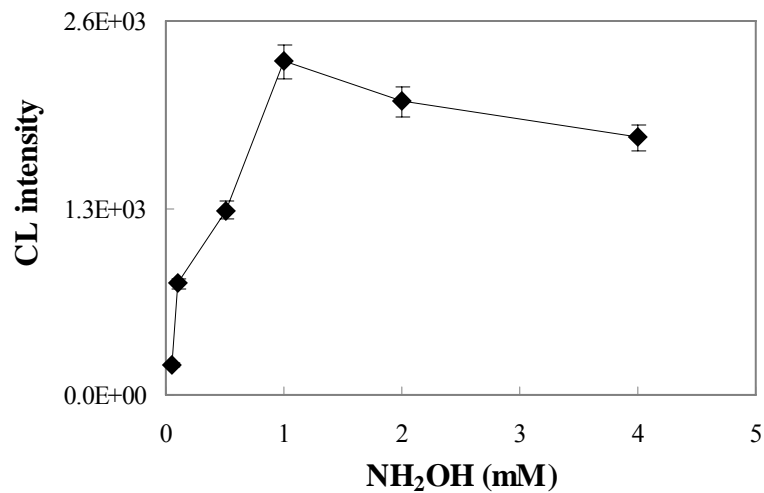

**Figure S7.** CL intensity vs. the concentration of NH<sub>2</sub>OH. Experimental conditions: capture probe, target DNA and biotinylated reporter sequence were 0.1, 0.0001 and 5 pmol, respectively; 40-nm streptavidin-gold was 56 pM; luminol, AgNO<sub>3</sub> and HAuCl<sub>4</sub> were 2.5, 1 and 0.1 mM, respectively.

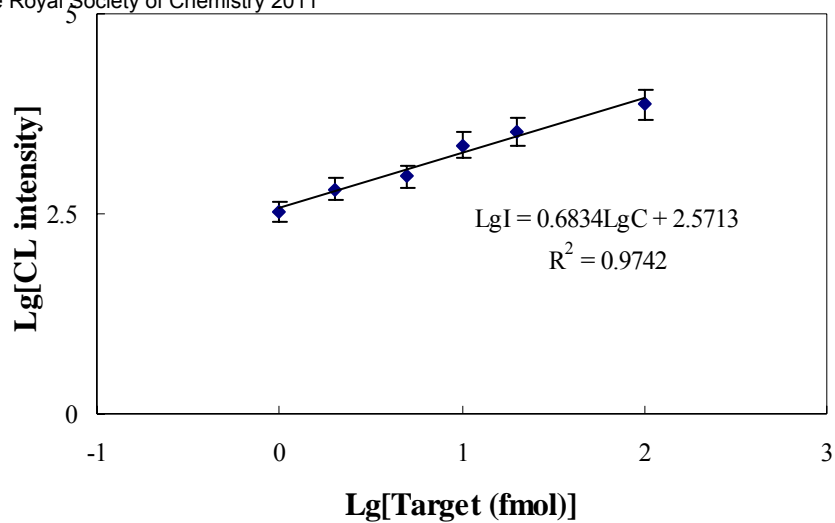

**Figure S8.** Log-Log calibration plot for the HBV target with 10-nm streptavidin-gold. Experimental conditions: capture probe and biotinylated reporter sequence were 0.1 and 5 pmol, respectively; 10-nm streptavidin-gold was 56 pM; luminol and AgNO<sub>3</sub> were 2.5 mM and 1mM, respectively.

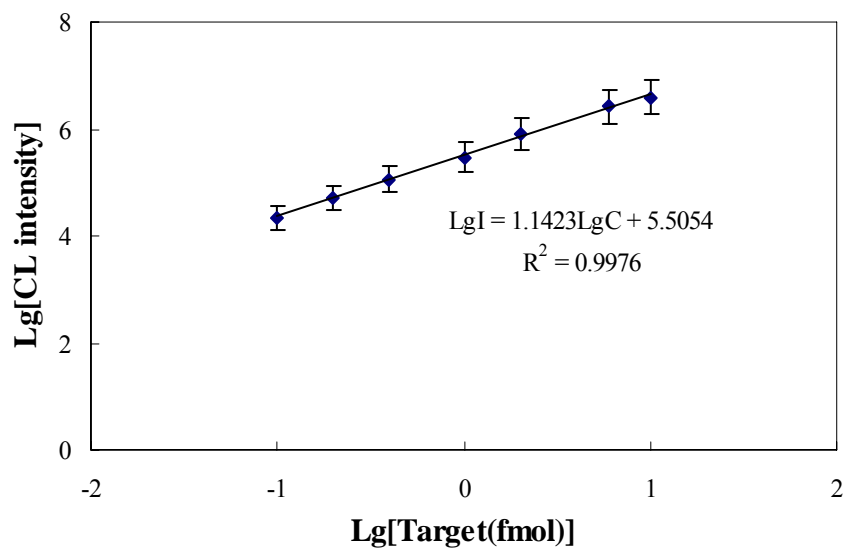

**Figure S9.** Log-Log calibration data for the HBV target with HRP. Experimental conditions: capture probe and biotinylated reporter sequence were 0.1 and 5 pmol, respectively; streptavidin-HRP was 20 ng; CL HRP substrate was 100  $\mu$ L.

**Table S2.** Comparison of sensitivity for different DNA assay methods

| Analytical method         | Label                              | No. of target bases | Detection limit         |
|---------------------------|------------------------------------|---------------------|-------------------------|
| Electrochemical detection | Ferrocene                          | 21                  | 1 fM <sup>1</sup>       |
| Electrochemical detection | Label-free                         | 33                  | 1 fM <sup>2</sup>       |
| Electrochemical detection | Liposome                           | 27                  | 1.2 pM <sup>3</sup>     |
| Electrochemical detection | HRP                                | 22                  | 17 pM <sup>4</sup>      |
| Fluorescence imaging      | Cy5                                | 30                  | 1 pM <sup>5</sup>       |
| Fluorescence imaging      | Silica NPs                         | 27                  | 0.8 fM <sup>6</sup>     |
| CL detection              | Label-free                         | 60                  | 5 nM <sup>7</sup>       |
| CL detection              | DNAzyme                            | 36                  | 1 nM <sup>8</sup>       |
| CL detection              | Pt NPs                             | 27                  | 10 pM <sup>9</sup>      |
| CL detection              | CuS NPs                            | 18                  | 0.55 pM <sup>10</sup>   |
| ECL detection             | Ru(bpy) <sub>3</sub> <sup>2+</sup> | 12                  | 5 pM <sup>11</sup>      |
| Colorimetric detection    | Ag/SiO <sub>2</sub>                | 24                  | 100 pM <sup>12</sup>    |
| Surface plasmon resonance | Label-free                         | 16                  | 10-100 pM <sup>13</sup> |
| Circular dichroism        | Label-free                         | 8 to 32             | 5 μM <sup>14</sup>      |
| CL detection (this work)  | Au NPs                             | 35                  | 8 fM                    |
| CL detection (this work)  | Au NPs                             | 35                  | 300 aM                  |

**Table S3.** Comparison of sensitivity for different DNA assay methods based on Au NPs

| Analytical method         | Label  | No. of target bases | Detection limit      |
|---------------------------|--------|---------------------|----------------------|
| Electrochemical detection | Au NPs | 19                  | 15 nM <sup>15</sup>  |
| Electrochemical detection | Au NPs | 19                  | 6 pM <sup>16</sup>   |
| Electrochemical detection | Au NPs | 27                  | 100 fM <sup>17</sup> |
| Electrochemical detection | Au NPs | 35                  | 0.6 fM <sup>18</sup> |
| Colorimetric detection    | Au NPs | 15                  | 60 nM <sup>19</sup>  |
| Colorimetric detection    | Au NPs | 30                  | 10 nM <sup>20</sup>  |



| Detection Method         | Target                          | Linear Range | Detection Limit      |
|--------------------------|---------------------------------|--------------|----------------------|
| Colorimetric detection   | Au NPs and nicking endonuclease | 24-80        | 10 pM <sup>20</sup>  |
| SPR                      | Au NPs                          | 30           | 1 pM <sup>21</sup>   |
| ICPMS                    | Au NPs                          | 40           | 0.2 pM <sup>22</sup> |
| Flatbed scanner          | Au NPs                          | 27           | 50 fM <sup>23</sup>  |
| SERS spectroscopy        | Au NPs and dyes                 | 30           | 20 fM <sup>24</sup>  |
| Scanometric              | Au NPs and Ag                   | 27           | 500 aM <sup>25</sup> |
| CL detection             | Au NPs and CuS                  | 42           | 4.8 fM <sup>26</sup> |
| CL detection (this work) | Au NPs                          | 35           | 8 fM                 |
| CL detection (this work) | Au NPs                          | 35           | 300 aM               |

**Table S4.** Comparison of linear ranges and detection limits for different target lengths

| Target DNA bases | Magnetic beads-based detection |                          | 96-well plate-based detection |                          |
|------------------|--------------------------------|--------------------------|-------------------------------|--------------------------|
|                  | Linear range ( fmol )          | Detection limit ( fmol ) | Linear range ( fmol )         | Detection limit ( fmol ) |
| 24               | 0.1~100                        | 0.1                      | 0.0025~1                      | 0.0025                   |
| 30               | 0.1~100                        | 0.1                      | 0.0025~1                      | 0.0025                   |
| 35               | 0.1~100                        | 0.1                      | 0.0025~1                      | 0.0025                   |
| 40               | 0.1~100                        | 0.1                      | 0.0025~1                      | 0.0025                   |
| 45               | 0.1~100                        | 0.1                      | 0.0025~1                      | 0.0025                   |

(Experimental conditions: streptavidin-gold was 56 pM; luminol and AgNO<sub>3</sub> was 2.5 and 1 mM, respectively. For magnetic beads-based detection: magnetic beads were 20 μg; capture probe and biotinylated reporter sequence were 1 and 5 pmol, respectively; for 96-well plate-based detection: capture probe and biotinylated reporter sequence were 0.1 and 5 pmol; respectively. Note also that the linear range and detection limit can be further improved for some of the target lengths, such as 40 and 45 bases)

- Supplementary Material (ESI) for Chemical Communications  
This journal is (c) The Royal Society of Chemistry 2011
1. Y. L. Zhang, Y. Wang, H. B. Wang, H. Jiang, G. L. Shen, R. Q. Yu and J. H. Li, *Anal. Chem.*, 2009, **81**, 1982-1987.
  2. J. Baur, C. Gondran, M. Holzinger, E. Defrancq, H. Perrot and S. Cosnier, *Anal. Chem.*, 2010, **82**, 1066-1072.
  3. H. KorriYoussofi, F. Garnier, P. Srivastava, P. Godillot and A. Yassar, *J. Am. Chem. Soc.*, 1997, **119**, 7388-7389.
  4. Z. P. Zhang, J. Y. Zhou, A. A. Tang, Z. Y. Wu, G. L. Shen and R. Q. Yu, *Biosens. Bioelectron.*, 2010, **25**, 1953-1957.
  5. D. M. Jenkins, B. Chami, M. Kreuzer, G. Presting, A. M. Alvarez and B. Y. Liaw, *Anal. Chem.*, 2006, **78**, 2314-2318.
  6. H. P. Lehr, M. Reimann, A. Brandenburg, G. Sulz and H. Klapproth, *Anal. Chem.*, 2003, **75**, 2414-2420.
  7. C. Z. Cao, C. Y. Liu, Y. Xia, K. Masaaki and J. Z. Lu, *Acta Chim Sinica*, 2005, **63**, 407-410.
  8. Z. J. Cao, Z. X. Li, Y. J. Zhao, Y. M. Song and J. Z. Lu, *Anal Chim Acta*, 2006, **557**, 152-158.
  9. R. Gill, R. Polsky and I. Willner, *Small*, 2006, **2**, 1037-1041.
  10. C. F. Ding, H. Zhong and S. S. Zhang, *Biosens. Bioelectron.*, 2008, **23**, 1314-1318.
  11. H. Wang, C. X. Zhang, Y. Li and H. L. Qi, *Anal Chim Acta*, 2006, **575**, 205-211.
  12. S. H. Liu, Z. H. Zhang and M. Y. Han, *Anal. Chem.*, 2005, **77**, 2595-2600.
  13. H. J. Lee, Y. Li, A. W. Wark and R. M. Corn, *Anal. Chem.*, 2005, **77**, 5096-5100.
  14. Y. L. Tang, K. E. Achyuthan and D. G. Whitten, *Langmuir*, 2010, **26**, 6832-6837.
  15. J. Wang, D. K. Xu, A. N. Kawde and R. Polsky, *Anal. Chem.*, 2001, **73**, 5576-5581.
  16. A. N. Kawde and J. Wang, *Electroanal*, 2004, **16**, 101-107.
  17. D. Li, Y. Yan, A. Wieckowska and I. Willner, *Chem. Commun.*, 2007, 3544-3546.
  18. M. Rochelet-Dequaire, B. Limoges and P. Brossier, *Analyst*, 2006, **131**, 923-929.
  19. K. Sato, K. Hosokawa and M. Maeda, *J. Am. Chem. Soc.*, 2003, **125**, 8102-8103.
  20. R. Elghanian, J. J. Storhoff, R. C. Mucic, R. L. Letsinger and C. A. Mirkin, *Science*, 1997, **277**, 1078-1081.
  21. T. A. Taton, G. Lu and C. A. Mirkin, *J. Am. Chem. Soc.*, 2001, **123**, 5164-5165.
  22. A. Merkoci, M. Aldavert, G. Tarrason, R. Eritja and S. Alegret, *Anal. Chem.*, 2005, **77**, 6500-6503.
  23. T. A. Taton, C. A. Mirkin and R. L. Letsinger, *Science*, 2000, **289**, 1757-1760.
  24. Y. W. C. Cao, R. C. Jin and C. A. Mirkin, *Science*, 2002, **297**, 1536-1540.
  25. J. M. Nam, S. I. Stoeva and C. A. Mirkin, *J. Am. Chem. Soc.*, 2004, **126**, 5932-5933.
  26. S. S. Zhang, H. Zhong and C. F. Ding, *Anal. Chem.*, 2008, **80**, 7206-7212.
